# Supplementary material for: Androgen receptor affects the response to immune checkpoint therapy by suppressing PD-L1 in hepatocellular carcinoma
Source: publisher site journal article supplement (doi:10.18632/aging.103231), 2020-06-24
Supplement: Supplementary file [file aging-v12i12-103231-supplementary-material-SD2.pdf]

**SUPPLEMENTARY TABLE**

**Supplementary Table 1. Specific primers and promotor of CD274.**

| Gene        | Primer     | Sequence                    | Experiment |
|-------------|------------|-----------------------------|------------|
| CD274       | CD274-F    | CACCGTGGCATTGCTGAACGCATTT   | RT-PCR     |
|             | CD274-R    | AAACCGTCCCCCTTTCTGATAAAAGCC |            |
| TIM3        | Tim3-F     | CACCGTGTGCTACTACTTACAAGGTC  | RT-PCR     |
|             | Tim3-R     | AAACGCAGGGCAGATAGGCATTCTC   |            |
| CTLA-4      | CTLA-4-F   | CACCGGCCCTGCACTCTCCTGTTTTT  | RT-PCR     |
|             | CTLA-4-R   | AAACGGTTGCCGCACAGACTTCAC    |            |
| 1st ARE-1   | ARE1-1-F   | CACCGTGGGTCTGCTGCTGACTTTT   | CHIP       |
|             | ARE1-1-R   | AAACAGGCGTCCCCCTTTCTGATAC   |            |
| 1st ARE-2   | ARE1-2-F   | CACCGAAGCCATATGGGTCTGCTGC   | CHIP       |
|             | ARE1-2-R   | AAACTTATCAGAAAGGCGTCCCCC    |            |
| 1st ARE-3   | ARE1-3-F   | CACCGTGGGTCTGCTGCTGACTTTTTA | CHIP       |
|             | ARE1-3-R   | AAACCAACATCTGAACGCACCTTGATC |            |
| 2nd ARE-1   | ARE2-1-F   | CACCGGAGGTGGGCGGGACCCCGCC   | CHIP       |
|             | ARE2-1-R   | AAACCAGCGAGCTAGCCAGAGATAC   |            |
| 2nd ARE-2   | ARE2-2-F   | CACCGGAGGTGGGCGGGACCCCGCC   | CHIP       |
|             | ARE2-2-R   | AAACGCCAGAGATACTGGGCCGTGC   |            |
| 2nd ARE-3   | ARE2-3-F   | CACCGCCAGTTCTGCGCAGCTTCC    | CHIP       |
|             | ARE2-3-R   | AAACGCTAGCCAGAGATACTGGGCC   |            |
| ARE control | Control1-F | CACCGGTAACCTTAAGCTCTTACCC   | CHIP       |
|             | Control1-R | AAACCTGTGTATAGAAATGAAACAC   |            |

CD274 promotorTAGAAGTTCAGCGCGGGATAACTTAAGTAAATTATGACACCATCGTCTGTCATCTTGGGCCATTCACTAACCCTAA  
GCTTTCAAAGGGCTTTCTAACCCCTCACCTAGAAATAGGCTTCCGCAGCCTTAATCCTTAGGGTGGCAGAATATCAGGGACCCTGAGCATTC  
TTAAAGATGTAGCTCGGGATGGGAAGTTCTTTAATGACAAAGCAAATGAAGTTTCATTATGTCGAGGAACCTTGAGGAAGTCACAGAAT  
CCACGATTTAAAAATATATTTCTATTATACACCCATACACACACACACACCTACTTTCTAGAATAAAAACCAAAGCCATATGGGTCTGCT  
GCTGACTTTTTATATGTTGTAGAGTTATATCAAGTTATGTCAAGATGTTCAAGTCACTTGAAGAGGCTTTTATCAGAAAGGGGGACGCCTTT  
CTGATAAAGGTTAAGGGGTAACCTTAAGCTCTTACCCCTCTGAAGGTAATCAAGGTGCGTTCAGATGTTGGCTTGTGTAATTTCTTTT  
TTTATTAATAACATACTAAATGTGGATTTGCTTTAATCTTCGAAACTCTCCCGGTGAAATCTCATTTACAAGAAAAGTGGACTGACATGTT  
TCACTTTCTGTTTCATTTCTATACACAGCTTTATTCTAGGACACCAACTAGATACCTAAACTGAAAGCTTCCGCCGATTTACCCGAAGGT  
CAGGAAAGTCCAACGCCCGCAAAGTGGATTTGCTGCCTTGGGCAGAGGTGGGCGGGACCCCGCTCCGGGCCTGGCGCAACGCTGAGC  
AGCTGGCGCGTCCCGCGCGGCCCCAGTTCTGCGCAGCTTCCCGAGGCTCCGCACCAGCCGCGCTTCTGTCCGCTGCAGGTAGGGAGCGT  
TGTTCTCCGCGGGTGCCACGGCCAGTATCTCTGGCTAGCTCGCTG
